# Supplementary material
Source: Springer Nature journal article supplement (https://www.springermedizin.de/resource/supplementary/12931_2013_1385_MOESM8_ESM.pdf/9426136)

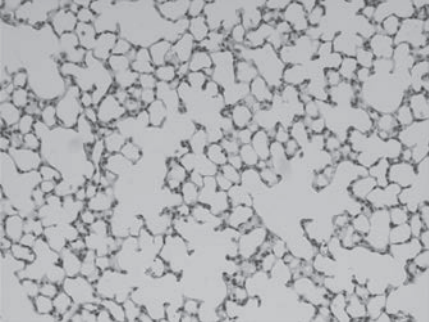

TGCre<sup>-/-</sup>;PDGFR $\alpha$ F<sup>-/-</sup>

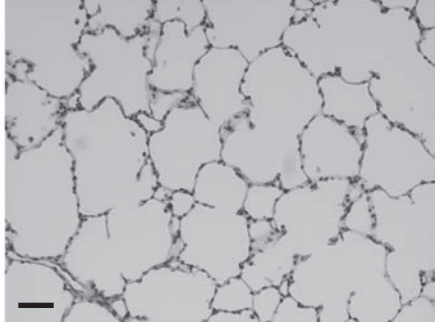

TGCre<sup>+/-</sup>;PDGFR $\alpha$ F<sup>/F</sup>

Supplement: MOESM8 [file 9426136]
